# Supplementary material for: Systematic Pan-Cancer Analysis of KLRB1 with Prognostic Value and Immunological Activity across Human Tumors
Source: J Immunol Res. 2022 Jan 3;2022:5254911. doi: 10.1155/2022/5254911 (PMC8749375; doi:10.1155/2022/5254911)
Supplement: Supplementary Materials — Figure S1: the relationship between KLRB1 expression and patient prognosis. (A) Univariate Cox regression of KLRB1 expression for disease-free interval (DFI) in 33 cancers. (B) Univariate Cox regression of KLRB1 expression for progression-free interval (PFI) in 33 cancers. (C) The Kaplan–Meier curves of DFI in the low and high groups stratified by KLPB1 expression. (D) The Kaplan–Meier curves of PFI in the low and high groups stratified by KLPB1 expression. Figure S2: the relationship between TREM2 expression and tumor microenvironment (TME). (A) Six tumors with the highest correlation coefficients between KLRB1 expression and immune score. (B) Six tumors with the highest correlation coefficients between KLRB1 expression and stromal score. Supplementary Table S1: list of datasets. Supplementary Table S2: list of the gene sets. Supplementary Table S3: correlations of KLRB1 expression with tumor mutation burden (TMB) and tumor microsatellite instability (MSI) in 33 cancer types. Supplementary Table S4: correlations of KLRB1 expression with TME in 33 cancer types. Supplementary Table S5: correlations of KLRB1 expression with immune signatures in 33 cancer types. Supplementary Table S6: correlations of KLRB1 expression, tumor mutation burden (TMB), and tumor glycolytic activity with immune score and immune cytolytic activity in 33 cancer types. [file 5254911.f1.zip › TableS1.txt]

Supplementary Table 1: List of datasets.
TCGA						GEO
Project (Abbreviations)	Cancer Type	Data type of expression	Tumor	Normal		Accession	Title	Cancer Type	Project (Abbreviations)	Data type of expression	Tumor	Normal
ACC	Adrenocortical carcinoma	RNA-seq	79	0		GSE13507	Predective Value of Prognosis-Related Gene Expression Study in Primary Bladder Cancer	Bladder Cancer	BLCA	microarray data	188	68
BLCA	Bladder Urothelial Carcinoma	RNA-seq	411	19		GSE139038	Gene expression profiling in paired normal, apparently normal and breast tumour tissues	Breast invasive carcinoma	BRCA	microarray data	41	24
BRCA	Breast invasive carcinoma	RNA-seq	1104	113		GSE37182	Time course analysis of colon cancer samples	Colon adenocarcinoma	COAD	microarray data	84	88
CESC	Cervical Squamous Cell Carcinoma and Endocervical Adenocarcinoma	RNA-seq	306	3		GSE25093	Global hypomethylation identifies loci targeted for hypermethylation in head and neck cancer	Head and Neck Squamous Cell Carcinoma	HNSC	microarray data	91	18
CHOL	Cholangiocarcinoma	RNA-seq	36	9		GSE40435	Integrative genome-wide gene expression profiling of clear cell renal cell carcinoma in Czech Republic	Kidney Renal Clear Cell Carcinoma	KIRC	microarray data	101	101
COAD	Colon adenocarcinoma	RNA-seq	471	41		GSE121248	Gene expression profiling of chronic hepatitis B induced HCC and adjacent-normal tissues	Hepatocellular Carcinoma	LIHC	microarray data	70	37
DLBC	Lymphoid Neoplasm Diffuse Large B-cell Lymphoma	RNA-seq	48	0		GSE10072	Gene expression signature of cigarette smoking and its role in lung adenocarcinoma development and survival	Lung Adenocarcinoma	LUAD	microarray data	58	49
ESCA	Esophageal Carcinoma	RNA-seq	162	11		GSE33532	Intratumor heterogeneity of gene expression profiles in early stage non-small cell lung cancer (NSCLC)	Lung Squamous Cell Carcinoma	LUSC	microarray data	80	20
GBM	Glioblastoma Multiforme	RNA-seq	168	5		GSE54129	Global gene expression analysis of gastric cancer by oligonucleotide microarrays	Stomach Adenocarcinoma	STAD	microarray data	111	21
HNSC	Head and Neck Squamous Cell Carcinoma	RNA-seq	502	44		GSE87211	Colorectal cancer susceptibility loci as predictive markers of rectal cancer prognosis after surgery	Rectum adenocarcinoma	READ	microarray data	203	160
KICH	Kidney Chromophobe	RNA-seq	65	24		GSE57545	Complement Roles Revealed by Immune Gene Profiling in Endometriosis and Endometriosis-Associated Ovarian Cancer	Uterine Corpus Endometrial Carcinoma	UCEC	microarray data	18	29
KIRC	Kidney Renal Clear Cell Carcinoma	RNA-seq	535	72
KIRP	Kidney Renal Papillary Cell Carcinoma	RNA-seq	289	32
LAML	Acute Myeloid Leukemia	RNA-seq	151	0
LGG	Brain Lower Grade Glioma	RNA-seq	529	0
LIHC	Hepatocellular Carcinoma	RNA-seq	374	50
LUAD	Lung Adenocarcinoma	RNA-seq	526	59
LUSC	Lung Squamous Cell Carcinoma	RNA-seq	501	49
MESO	Mesothelioma	RNA-seq	86	0
OV	Ovarian serous cystadenocarcinoma	RNA-seq	379	0
PAAD	Pancreatic Adenocarcinoma	RNA-seq	178	4
PCPG	Pheochromocytoma and Paraganglioma	RNA-seq	183	3
PRAD	Prostate Adenocarcinoma	RNA-seq	499	52
READ	Rectum adenocarcinoma	RNA-seq	167	10
SARC	Sarcoma	RNA-seq	263	2
SKCM	Skin Cutaneous Melanoma	RNA-seq	471	1
STAD	Stomach Adenocarcinoma	RNA-seq	375	32
TGCT	Testicular Germ Cell Tumors	RNA-seq	156	0
THCA	Thyroid Carcinoma	RNA-seq	510	58
THYM	Thymoma	RNA-seq	119	2
UCEC	Uterine Corpus Endometrial Carcinoma	RNA-seq	548	35
UCS	Uterine Carcinosarcoma	RNA-seq	56	0
UVM	Uveal Melanoma	RNA-seq	80	0
