# Supplementary material for: Systematic Pan-Cancer Analysis of KLRB1 with Prognostic Value and Immunological Activity across Human Tumors
Source: J Immunol Res. 2022 Jan 3;2022:5254911. doi: 10.1155/2022/5254911 (PMC8749375; doi:10.1155/2022/5254911)
Supplement: Supplementary Materials — Figure S1: the relationship between KLRB1 expression and patient prognosis. (A) Univariate Cox regression of KLRB1 expression for disease-free interval (DFI) in 33 cancers. (B) Univariate Cox regression of KLRB1 expression for progression-free interval (PFI) in 33 cancers. (C) The Kaplan–Meier curves of DFI in the low and high groups stratified by KLPB1 expression. (D) The Kaplan–Meier curves of PFI in the low and high groups stratified by KLPB1 expression. Figure S2: the relationship between TREM2 expression and tumor microenvironment (TME). (A) Six tumors with the highest correlation coefficients between KLRB1 expression and immune score. (B) Six tumors with the highest correlation coefficients between KLRB1 expression and stromal score. Supplementary Table S1: list of datasets. Supplementary Table S2: list of the gene sets. Supplementary Table S3: correlations of KLRB1 expression with tumor mutation burden (TMB) and tumor microsatellite instability (MSI) in 33 cancer types. Supplementary Table S4: correlations of KLRB1 expression with TME in 33 cancer types. Supplementary Table S5: correlations of KLRB1 expression with immune signatures in 33 cancer types. Supplementary Table S6: correlations of KLRB1 expression, tumor mutation burden (TMB), and tumor glycolytic activity with immune score and immune cytolytic activity in 33 cancer types. [file 5254911.f1.zip › TableS2.txt]

Supplementary Table 2: List of the gene sets.
HLA: human leukocyte antigen; IFN: interferon response; TILs: tumor-infiltrating lymphocytes; CYT: immune cytolytic activity
Immune signatures					Checkpoint genes		Glycolysis-related gene set		Immune cells
HLA	IFN	TILs	CYT		IDO1		HK3		CD8+CD4+ T cell	B cell	Macrophages
HLA-E	JAK2	ITM2C	PRF1		LAG3		HK1		CD8A	BACH2	C11orf45
HLA-DPB2	IRF1	CD38	GZMA		CTLA4		HK2		GPR1	BANK1	CD68
HLA-C	IRF2	THEMIS2			TNFRSF9		HKDC1		FOXP3	BLK	CLEC5A
HLA-J	GBP4	GLYR1			ICOS		GCK		CTLA4	BTLA	CYBB
HLA-DQB1	GBP5	ICOS			CD80		GPI		IL32	CD79A	FUCA1
HLA-DQB2		F5			PDCD1LG2		PFKM		C15orf53	CD79B	GPNMB
HLA-DQA2		TIGIT			TIGIT		PFKP		IL4	FCRL1	HS3ST2
HLA-DQA1		KLRD1			CD70		PFKL			FCRL3	LGMN
HLA-A		IRF4			TNFSF9		FBP1			HVCN1	MMP9
HLA-DMA		PRKCQ			ICOSLG		FBP2			RALGPS2	TM4SF19
HLA-DOB		FCRL5			KIR3DL1		ALDOC
HLA-DRB1		SIRPG			CD86		ALDOA
HLA-H		LPXN			PDCD1		ALDOB
HLA-B		IL2RG			LAIR1		TPI1
HLA-DRB5		CCL5			TNFRSF8		GAPDH
HLA-DOA		LCK			TNFSF15		GAPDHS
HLA-DPB1		TRAF3IP3			TNFRSF14		PGK2
HLA-DRA		CD86			IDO2		PGK1
HLA-DRB6		MAL			CD276		PGAM1
HLA-L		LILRB1			CD40		PGAM2
HLA-F		DOK2			TNFRSF4		PGAM4
HLA-G		CD6			TNFSF14		ENO3
HLA-DMB		PAG1			HHLA2		ENO2
HLA-DPA1		LAX1			CD244		ENO1
		PLEK			CD274		ENO4
		PIK3CD			HAVCR2		PKM
		SLAMF1			CD27		PKLR
		XCL1			BTLA		PDHA2
		GPR171			LGALS9		PDHA1
		XCL2			TMIGD2		PDHB
		TBX21			CD28		DLAT
		CD2			CD48		DLD
		CD53			TNFRSF25		LDHAL6A
		KLHL6			CD40LG		LDHAL6B
		SLAMF6			ADORA2A		LDHA
		CD40			VTCN1		LDHB
		SIT1			CD160		LDHC
		TNFRSF4			CD44		ADH1A
		CD79A			TNFSF18		ADH1B
		CD247			TNFRSF18		ADH1C
		LCP2			BTNL2		ADH7
		CD3D			C10orf54		ADH4
		CD27			CD200R1		ADH5
		SH2D1A			TNFSF4		ADH6
		FYB			CD200		AKR1A1
		ARHGAP30			NRP1		ALDH2
		ACAP1					ALDH3A2
		CST7					ALDH1B1
		CD3G					ALDH7A1
		IL2RB					ALDH9A1
		CD3E					ALDH3B1
		FCRL3					ALDH3B2
		CORO1A					ALDH1A3
		ITK					ALDH3A1
		TCL1A					ACSS1
		CYBB					ACSS2
		CSF2RB					GALM
		IKZF1					PGM1
		NCF4					PGM2
		DOCK2					G6PC
		CCR2					G6PC2
		PTPRC					G6PC3
		PLAC8					ADPGK
		NCKAP1L					BPGM
		IL7R					MINPP1
		6-Sep					PCK1
		CD28					PCK2
		STAT4
		CD8A
		LY9
		CD48
		HCST
		PTPRCAP
		SASH3
		ARHGAP25
		LAT
		TRAT1
		IL10RA
		PAX5
		CCR7
		DOCK11
		PARVG
		SPNS1
		CD52
		HCLS1
		ARHGAP9
		GIMAP6
		PRKCB
		MS4A1
		GPR18
		TBC1D10C
		GVINP1
		P2RY8
		EVI2B
		VAMP5
		KLRK1
		SELL
		MPEG1
		MS4A6A
		ARHGAP15
		MFNG
		GZMK
		SELPLG
		TARP
		GIMAP7
		FAM65B
		INPP5D
		ITGA4
		MZB1
		GPSM3
		STK10
		CLEC2D
		IL16
		NLRC3
		GIMAP5
		GIMAP4
		IFFO1
		CFH
		PVRIG
		CFHR1
